# Supplementary material
Source: PubMed Central journal article supplement (PMC6142994)
Supplement: jamaotolaryngolheadnecksurg-144-727-s001.pdf [file jamaotolaryngolheadnecksurg-144-727-s001.pdf]

## Supplementary Online Content

Adjei Boakye E, Buchanan B, Hinyard L, et al. Incidence and risk of second primary malignant neoplasm after a first head and neck squamous cell carcinoma. *JAMA Otolaryngol Head Neck Surg*. Published online July 19, 2018. doi:10.1001/jamaoto.2018.0993

**eTable 1.** Anatomic site of SPM among white males aged 20-54 with oropharynx squamous cell carcinoma, SEER 2000-2014 (N=900)

This supplementary material has been provided by the authors to give readers additional information about their work.

Supplemental eTable. Anatomic site of SPM among white males aged 20-54 with oropharynx squamous cell carcinoma, SEER 2000-2014 (N=900)

| Site of SPM*                                                                                                                                                                                             | Observed | SIR   |               | EAR per 10,000 PYR |
|----------------------------------------------------------------------------------------------------------------------------------------------------------------------------------------------------------|----------|-------|---------------|--------------------|
|                                                                                                                                                                                                          |          | Rate  | 95% CI        |                    |
| All solid tumors                                                                                                                                                                                         | 842      | 2.29  | 2.23 – 2.55   | 80.05              |
| Lung and Bronchus                                                                                                                                                                                        | 207      | 5.36  | 4.65 – 6.14   | 27.55              |
| Tongue                                                                                                                                                                                                   | 118      | 19.51 | 16.15 – 23.37 | 18.32              |
| Gum and Other Mouth                                                                                                                                                                                      | 38       | 25.50 | 18.04 – 35.00 | 5.97               |
| Esophagus                                                                                                                                                                                                | 38       | 6.84  | 4.84 – 9.39   | 5.31               |
| Pharynx                                                                                                                                                                                                  | 27       | 11.27 | 7.42 – 16.40  | 4.03               |
| Larynx                                                                                                                                                                                                   | 28       | 5.77  | 3.83 – 8.34   | 3.79               |
| Floor of Mouth                                                                                                                                                                                           | 24       | 24.12 | 15.45 – 35.89 | 3.76               |
| Thyroid                                                                                                                                                                                                  | 26       | 2.69  | 1.76 – 3.94   | 2.67               |
| Tonsil                                                                                                                                                                                                   | 21       | 3.97  | 2.46 – 6.07   | 2.57               |
| Kidney                                                                                                                                                                                                   | 29       | 1.59  | 1.07 – 2.29   | 1.77               |
| Other Oral Cavity and Pharynx                                                                                                                                                                            | 10       | 24.17 | 11.57 – 44.45 | 1.57               |
| Hypopharynx                                                                                                                                                                                              | 10       | 10.25 | 4.91 – 18.85  | 1.48               |
| Oropharynx                                                                                                                                                                                               | 9        | 11.62 | 5.30 – 22.06  | 1.35               |
| Nasopharynx                                                                                                                                                                                              | 8        | 12.38 | 5.33 – 24.40  | 1.20               |
| SPM = Second primary malignancy; SEER = Surveillance, Epidemiology, and End Results; SIR = Standardized incidence ratio; EAR = Excess absolute risk; PYR = Person-year at risk; CI = Confidence interval |          |       |               |                    |
| *Second primary malignancies are those with at least one excess cases per 10,000 PYR                                                                                                                     |          |       |               |                    |
